# Supplementary material for: Nano-sized graphene flakes: insights from experimental synthesis and first principles calculations
Source: Royal Society of Chemistry journal article supplement (doi:10.1039/c6cp08354d), 2016-12-20
Supplement: c6cp08354d1.pdf [file c6cp08354d1.pdf]

## Supporting Information

# Nano-sized graphene flakes: Insights from experimental synthesis and first principles calculations

Pin-Chun Lin,<sup>a</sup> Yi-Rui Chen,<sup>b</sup> Kuei-Ting Hsu,<sup>c</sup> Tzu-Neng Lin,<sup>d</sup>  
Kuo-Lun Tung,<sup>b,\*</sup> Ji-Lin Shen<sup>d</sup> and Wei-Ren Liu<sup>a,\*</sup>

<sup>a</sup> Department of Chemical Engineering, Chung Yuan Christian University, Chungli, 32023, Taiwan, R.O.C.

<sup>b</sup> Department of Chemical Engineering, National Taiwan University, Taipei 10617, Taiwan, R.O.C.

<sup>c</sup> Department of Chemical Engineering, Army Academy, Chungli 32023, Taiwan, R.O.C.

<sup>d</sup> Department of Physics, Chung Yuan Christian University, Chungli, 32023, Taiwan, R.O.C.

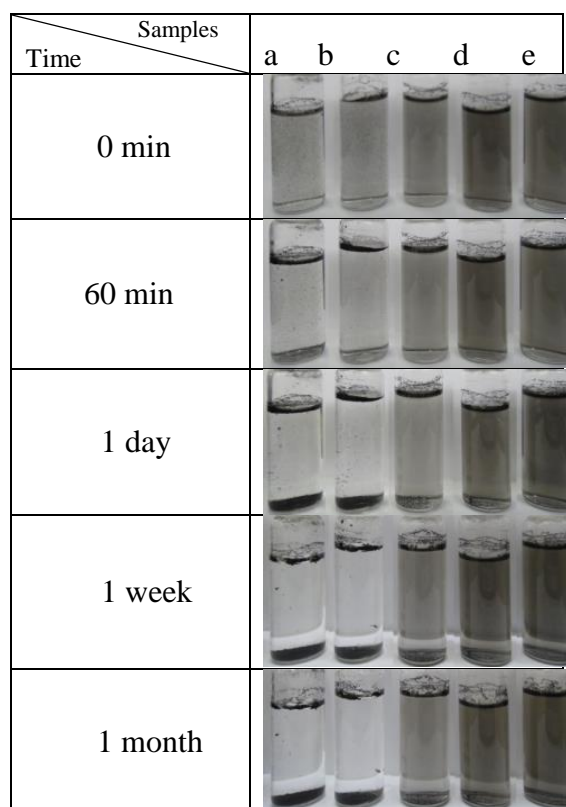

**Figure S1.** Photographs of the dispersion of GNFs in DI water for different applied pressures, (a) 16000 lb/in<sup>2</sup>, (b) 32000 lb/in<sup>2</sup>, (c) 48000 lb/in<sup>2</sup>, (d) 65000 lb/in<sup>2</sup>, and (e) 81000 lb/in<sup>2</sup>.

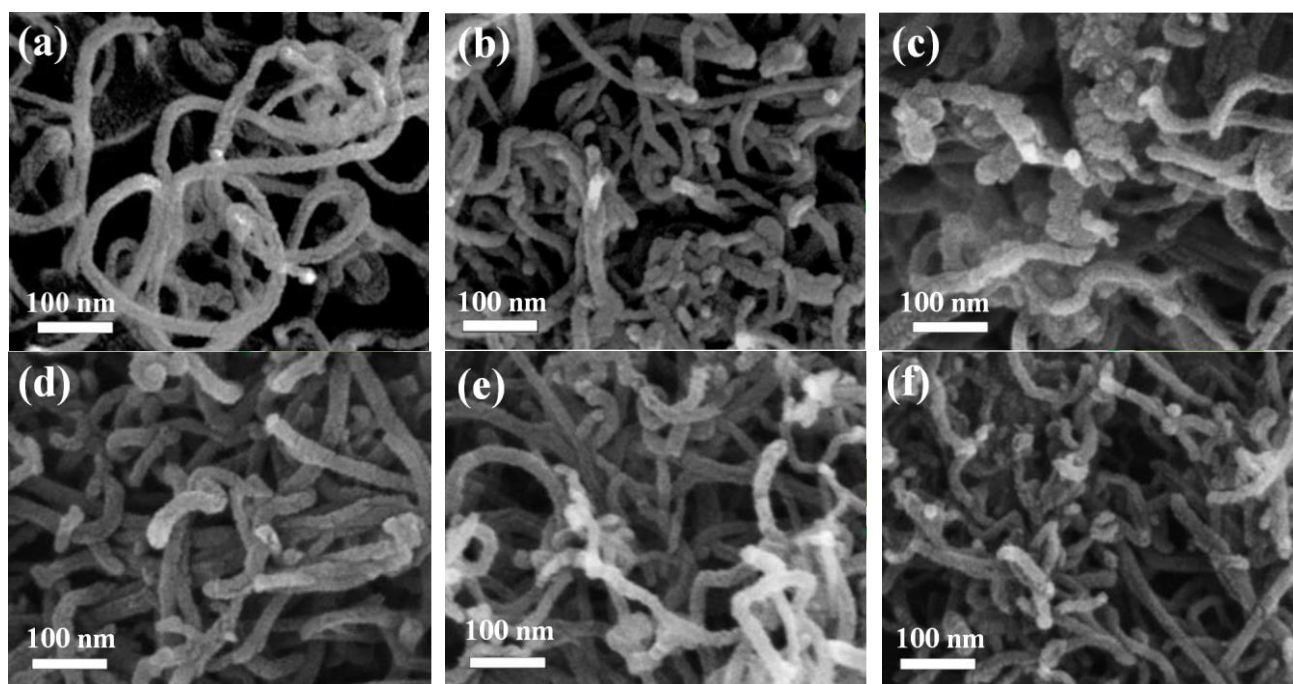

**Figure S2.** SEM images of squashed CNTs under different pressures (Step 1), (a) origin, (b) 16000 lb/in<sup>2</sup>, (c) 32000 lb/in<sup>2</sup>, (d) 48000 lb/in<sup>2</sup>, (e) 65000 lb/in<sup>2</sup>, and (f) 81000 lb/in<sup>2</sup>.

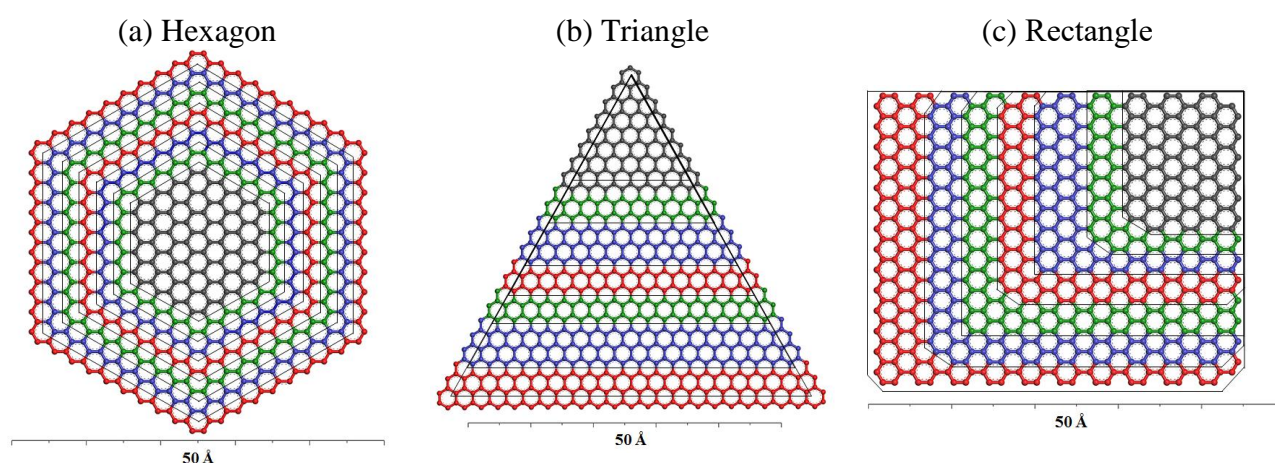

**Figure S3** Schematic illustration of the three type GNFs: (a) Hexagon, (b) Triangle, (c) Rectangle.

**Table S1** Carbon atoms of each layer GNFs in Figure S3. The number of hydrogen atoms that can be bonded to bare (H-unpassivated) GNFs is presented in parentheses.

|                                          | Hexagon                             | Triangle                            | Rectangle                           |
|------------------------------------------|-------------------------------------|-------------------------------------|-------------------------------------|
| <b>Layer1 (black)</b><br>(Molecule-like) | C <sub>96</sub> (H <sub>24</sub> )  | C <sub>97</sub> (H <sub>27</sub> )  | C <sub>96</sub> (H <sub>26</sub> )  |
| <b>Layer2 (green)</b>                    | C <sub>150</sub> (H <sub>30</sub> ) | C <sub>141</sub> (H <sub>33</sub> ) | C <sub>142</sub> (H <sub>32</sub> ) |
| <b>Layer3 (blue)</b>                     | C <sub>216</sub> (H <sub>36</sub> ) | C <sub>222</sub> (H <sub>42</sub> ) | C <sub>214</sub> (H <sub>40</sub> ) |
| <b>Layer4 (red)</b>                      | C <sub>294</sub> (H <sub>42</sub> ) | C <sub>286</sub> (H <sub>48</sub> ) | C <sub>290</sub> (H <sub>46</sub> ) |
| <b>Layer5 (green)</b>                    | C <sub>384</sub> (H <sub>48</sub> ) | C <sub>358</sub> (H <sub>54</sub> ) | C <sub>382</sub> (H <sub>54</sub> ) |
| <b>Layer6 (blue)</b>                     | C <sub>486</sub> (H <sub>54</sub> ) | C <sub>481</sub> (H <sub>63</sub> ) | C <sub>482</sub> (H <sub>60</sub> ) |
| <b>Layer7 (red)</b><br>(Bulk-like)       | C <sub>600</sub> (H <sub>60</sub> ) | C <sub>622</sub> (H <sub>72</sub> ) | C <sub>607</sub> (H <sub>69</sub> ) |
